# Supplementary material
Source: PubMed Central journal article supplement (PMC3000941)
Supplement: supp_M110.129718_Supplement.pdf [file supp_M110.129718_Supplement.pdf]

# Figure S1

20S proteasome chymotryptic activity  
using suc-LLVY-AMC

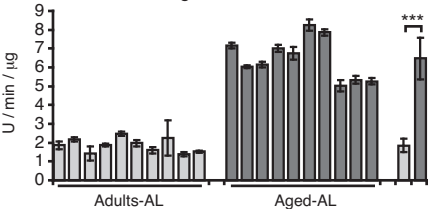

**Figure S2**

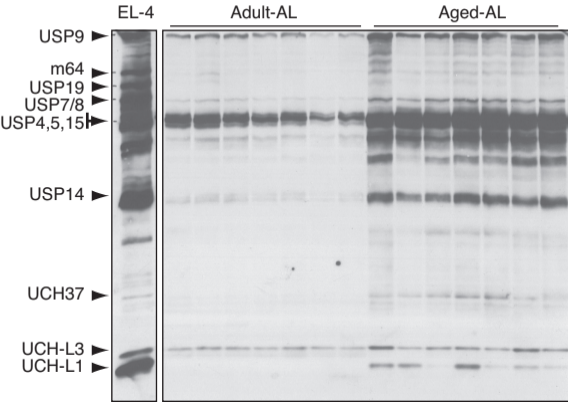

Figure S3

**A**

**E6AP protein quantitation**

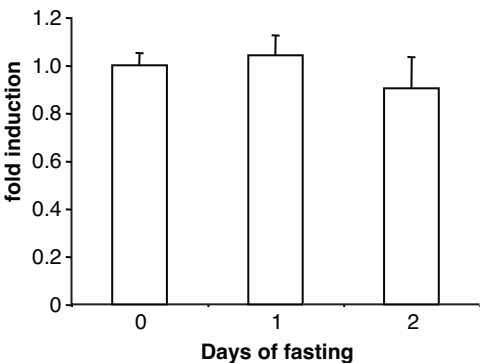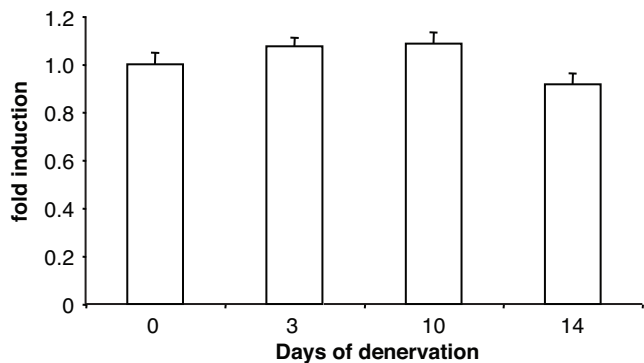

**B**

**CHIP protein quantitation**

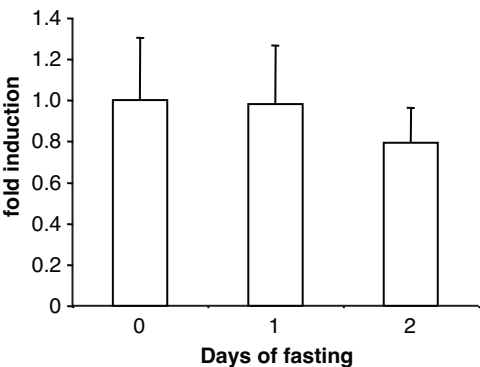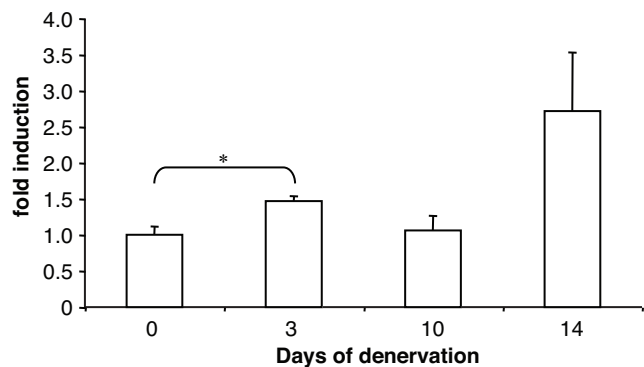

## Supplementary Table

**Table I:** Antibodies used in this study.

| Host   | Antisera        | Dilution | Source                                              |
|--------|-----------------|----------|-----------------------------------------------------|
| Rabbit | Anti-β1         | 1:1000   | Affinity BioReagents, Golden, CO, USA               |
| Mouse  | Anti-β3         | 1:5000   | Affinity BioReagents, Golden, CO, USA               |
| Rabbit | Anti-β1i        | 1:1000   | Affinity BioReagents, Golden, CO, USA               |
| Rabbit | Anti-β5         | 1:1000   | Affinity BioReagents, Golden, CO, USA               |
| Rabbit | Anti-β5i        | 1:1000   | Affinity BioReagents, Golden, CO, USA               |
| Mouse  | anti-Rpt5       | 1:1000   | BIOMOL Int., L.P., Plymouth Meeting, PA, USA        |
| Mouse  | Anti-Rpt6       | 1:1000   | BIOMOL Int., L.P., Plymouth Meeting, PA, USA        |
| Mouse  | Anti-Rpt1       | 1:10000  | BIOMOL Int., L.P., Plymouth Meeting, PA, USA        |
| Rabbit | Anti-polyUb     | 1:10000  | BIOMOL Int., L.P., Plymouth Meeting, PA, USA        |
| Rabbit | Anti-Rpn11      | 1:10000  | GenWay Biotech, Inc., San Diego, CA, USA            |
| Rabbit | Anti-USP5       | 1:10000  | Protein Tech Group Inc., Chicago, IL, USA           |
| Mouse  | Anti-UNC45B     | 1:1000   | Abnova Coporation, Taipei, Taiwan                   |
| Mouse  | Anti-Chip       | 1:1000   | Santa Cruz Biotechnology, Inc., Santa Cruz, CA, USA |
| Goat   | Anti-Npl4       | 1:1000   | Santa Cruz Biotechnology, Inc., Santa Cruz, CA, USA |
| Goat   | Anti-Ufd2       | 1:1000   | Santa Cruz Biotechnology, Inc., Santa Cruz, CA, USA |
| Rabbit | Anti-p47        | 1:1000   | Santa Cruz Biotechnology, Inc., Santa Cruz, CA, USA |
| Goat   | Anti-USP14      | 1:10,000 | Santa Cruz Biotechnology, Inc., Santa Cruz, CA, USA |
| Mouse  | Anti-p97/VCP    | 1:10,000 | BD Transduction Laboratories, USA                   |
| Rabbit | Anti-E6AP       | 1:1000   | Santa Cruz Biotechnology, Inc., Santa Cruz, CA, USA |
| Rabbit | Anti-Ecm29      | 1:10,000 | Abcam Inc., Cambridge, MA, USA                      |
| Rabbit | Anti-PA200      | 1:10000  | Affinity BioReagents, Golden, CO, USA               |
| Mouse  | Anti-MuRF1      | 1:30     | Generous gift of Regeneron Pharmaceuticals          |
| Rabbit | Anti-Atrogin-1  | 1:1000   | EMC Biosciences, Versailles, KY, USA                |
| Mouse  | Anti-HA         | 1:10000  | 12CA5, Roche Applied Science, Indianapolis, IN, USA |
| Rabbit | Anti-Dansyl     | 1:7500   | Molecular probes, Invitrogen, UK                    |
| Mouse  | Anti-Vinculin   | 1:5000   | Abcam Inc., Cambridge, MA, USA                      |
| Rabbit | Anti-β-actin    | 1:1000   | Cell signaling, Beverly, MA, USA                    |
| Rabbit | Anti-20S        | 3:1000   | Generous gift of Dr John Monaco                     |
| Rabbit | Anti-Biotin-HRP | 1:10000  | Sigma-Aldrich, USA                                  |
| Rabbit | Anti-goat-HRP   | 1:10000  | Dako, Cambridgeshire, UK                            |
| Goat   | Anti-rabbit-HRP | 1:10000  | Amersham Biosciences, Buckinghamshire, UK           |
| Goat   | Anti-mouse-HRP  | 1:10000  | Amersham Biosciences, Buckinghamshire, UK           |

## Supplementary Table

**Table II:** Real-time PCR primers used in this study.

| Molecule       | Subunit           | Sense primer sequence (5'-3') | Antisense primer sequence (5'-3') |
|----------------|-------------------|-------------------------------|-----------------------------------|
| Proteasome     | 20S- $\alpha$ 2   | cattcagcccatctggtaaactgt      | ctgtacaccaaacgatgtgctt            |
| Proteasome     | 20S- $\alpha$ 3   | agctgagtaaagcggcgctgatctg     | tcccaacaagtgcctgcggtgc            |
| Proteasome     | 20S- $\beta$ 1    | acaagctgaccctatccac           | cctgcgatgatgattcctg               |
| Proteasome     | 20S- $\beta$ 5    | agacagtgaggggaacaggat         | cgcacatggtagagggtgac              |
| Proteasome     | 20S- $\beta$ 2    | cagagttgtcacagcgaatc          | tccagacccaagtcatfa                |
| Proteasome     | 20S- $\beta$ 1i   | tcgtggggctctgatt              | tcgcggtagctgtaggagatg             |
| Proteasome     | 20S- $\beta$ 5i   | ctctcgggacagatgtctc           | cccaaccgtctttctca                 |
| Proteasome     | 11S-PA28 $\alpha$ | agccaacctgagcaatctga          | tcgtctctgcccctttctt               |
| Proteasome     | 19S-Rpt5          | gacctggactcgcagaggaa          | aacceaatcactggcaggaa              |
| Proteasome     | 19S-Rpn9          | gtttggcaccgttgaaga            | gcatgggtcctgcacaaaat              |
| E2-14kDa       |                   | gtgcaccatctgaaaacaa           | atcggttctgcaggatgtct              |
| Atrogin-1      | (MAFbx)           | ccatcaggagaagtggatctatgtt     | gcttccccaaagtgcagta               |
| MuRF1          |                   | tgtctggaggtcgtttccg           | atgccggtccatgatcactt              |
| PAC1           |                   | ggcgttcctttcatcgtt            | agcagctacactggcagaga              |
| PAC2           |                   | cccgacctaaagaacttcac          | ggcaccaggcaatcagta                |
| POMP           | (hUmp1)           | ggttcagcgtcttccgttc           | gctcgcctcagttcactt                |
| p97            |                   | gaaggcatcactggcaatct          | tcctcatcctctcgttga                |
| P47            |                   | gatcatcgggacgaggactt          | ccatctgccagtcggattt               |
| Chip           |                   | aagagtgtcagcggaaacca          | caatgtccttgcggtcatag              |
| E6AP           |                   | gacaatagaattcgcattg           | tccttagccggacaagt                 |
| Npl4           |                   | gccgagagcatcataatcc           | gtaaaccgagaagccgttgt              |
| Ufd2           |                   | cactctgccaacgatga             | cgaatgtagcgacgacaa                |
| Unc45B         |                   | cgtacctcactttgacgctgat        | gccagcagcttctcacacga              |
| $\beta$ -actin |                   | tcgtaccactggcattgtgat         | cgaagtctaggccaacatagca            |
